RESEARCH ARTICLE

# Electronic health record in military healthcare systems: A systematic review

Amir Torab-Miandoab<sup>1,2</sup>, Mahdi Basiri<sup>3</sup>, Arasb Dabbagh-Moghaddam<sup>4,5</sup>,  
Leila Gholamhosseini<sup>1\*</sup>

**1** Department of Health Information Technology, School of Paramedical Sciences, AJA University of Medical Sciences, Tehran, Iran, **2** Department of Health Information Technology, School of Management and Medical Informatics, Tabriz University of Medical Sciences, Tabriz, Iran, **3** Department of Knowledge Management, School of Social Science, AJA University of Command and Staff, Tehran, Iran, **4** Department of Public Health and Nutrition, AJA University of Medical Sciences, Tehran, Iran, **5** Infectious Diseases Research Center, AJA University of Medical Sciences, Tehran, Iran

\* [Le\\_hosseini@yahoo.com](mailto:Le_hosseini@yahoo.com)

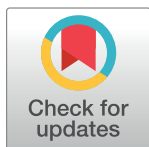

## Abstract

### Introduction

The immediate access to detailed patient data is vital for effective medical care in military and emergency scenarios, enhancing diagnosis, treatment, and monitoring of military personnel. The integration of electronic health records (EHRs) is urgently needed in military healthcare systems, despite the distinct hurdles involved. Current literature on EHR use in military healthcare is lacking and disjointed. This study aims to bridge this gap through a systematic review, offering a thorough examination of the advantages, obstacles, and recommended strategies for implementing EHRs in military healthcare environments.

### Materials and methods

According to the PRISMA guideline, a comprehensive electronic search of all relevant literature on the topic was carried out across multiple databases, including PubMed, Web of Science, Scopus, IEEE, ProQuest, MEDLINE, Cochrane Library, Embase, SID, and ISC up to July 20, 2024. The inclusion criteria involved choosing English-language articles that were available in full text and closely aligned with the study's objectives. The data extraction sheet for each study included information including the authors, publication year, country, research goals, architecture and components, context, processes involved, standards utilized, platform and technology, level of implementation, interoperability issues, challenges faced, information resources, and significant findings.

### Results

A total of 9,618 titles were retrieved from different databases. After removing duplicates, 6,051 titles were left. Upon evaluation, 29 articles were chosen for inclusion in the review. The results show that most of the studies were carried out at the United States Department of Defense (DoD) level with the aim of improving the quality of care and patient safety, as well as integrating healthcare delivery. Additionally, the studies covered various processes

## OPEN ACCESS

**Citation:** Torab-Miandoab A, Basiri M, Dabbagh-Moghaddam A, Gholamhosseini L (2025) Electronic health record in military healthcare systems: A systematic review. PLoS ONE 20(2): e0313641. <https://doi.org/10.1371/journal.pone.0313641>

**Editor:** Fabrizio Pecoraro, National Research Council, ITALY

**Received:** January 14, 2024

**Accepted:** October 29, 2024

**Published:** February 12, 2025

**Copyright:** © 2025 Torab-Miandoab et al. This is an open access article distributed under the terms of the [Creative Commons Attribution License](https://creativecommons.org/licenses/by/4.0/), which permits unrestricted use, distribution, and reproduction in any medium, provided the original author and source are credited.

**Data Availability Statement:** All relevant data are within the manuscript.

**Funding:** The author(s) received no specific funding for this work.

**Competing interests:** The authors have declared that no competing interests exist.

**Abbreviations:** EHR, Electronic Health Record; CMS, Centers for Medicare & Medicaid Services; HL7 FHIR, Health Level Seven Fast Healthcare Interoperability Resources; SQL, Structured Query

Language; CCD, Continuity of Care Document; CCR, Continuity of Care Record; SOAP, Simple Object Access Protocol; API, Application Programming Interfaces; SDK, Software Development Kits; HIPAA, Health Insurance Portability and Accountability Act; XML, Extensible Markup Language; HTML, Hyper Text Markup Language; CDA, Clinical Document Architecture; PHR, Personal Health Record; ICD, International Classification of Disease; RAM, Random-Access Memory; CPU, Central Process unit; AHIMA, American Health Information Management Association; SOA, Service-Oriented Architecture; HITECH, Health Information Technology for Economic and Clinical Health; REST, Representational State Transfer; IHE XDS, Integrating the Healthcare Enterprise Cross-Enterprise Document Sharing; WSDL, Web Services Description Language; EMR, Electronic Medical Records; ISO/TC, International Standardization Organization Technical Committee; SNOMED CT, Systematized Medical Nomenclature for Medicine—Clinical Terminology; DSM, Diagnostic and Statistical Manual of Mental Disorders; OPCS, Office of Population Censuses and Surveys Classification of Interventions and Procedures; NLP, Natural Language Processing; CPOE, Computerized Provider Order Entry; CDR, Clinical Data Repository; PRISMA, Preferred Reporting Items for Systematic Reviews and Meta-analyses; IEEE, Institute of Electrical and Electronics Engineers; SID, Scientific Information Database; ISC, Islamic World Science Citation Center; QUADAS, Quality Assessment of Diagnostic Accuracy Studies; SDK, Software Development Kit; CDSS, Clinical Decision Support System; DoD, Department of Defense.

such as clinical documentation, appointment scheduling, research, telemedicine, decision support, and computerized physician order entry. Health level seven fast healthcare interoperability resources (HL7 FHIR), clinical document architecture (CDA), health insurance portability and accountability act (HIPAA), international classification of diseases 10th and 9th revision (ICD 10, ICD 9), international organization for standardization technical committees (ISO TC), software development kits (SDKs), and web-based architecture are some of the most important requirements for implementing EHR. The most significant challenges reported in the implementation of EHR included concerns about privacy and security, the sensitive military deployment environment, infrastructure limitations, and interoperability concerns.

## Conclusions

Policymakers and practitioners can get insight from the findings regarding the standards that must be met, the challenges that must be overcome, and the requirements for EHR implementation in military healthcare settings. It could be a useful starting point when implementing EHRs in military healthcare systems, especially in nations where e-health development and planning are still in their early stages.

## Introduction

In recent years, the utilization of Electronic Health Records (EHRs) has gained immense popularity and has become a significant component in modern healthcare systems [1]. EHRs have revolutionized the healthcare industry by transforming the way medical information is stored, managed, and shared [2]. EHRs refer to digital versions of patients' medical records that are stored and accessible through secure electronic platforms and contains medical history, diagnoses, medications, treatment plans, immunization dates, allergies, radiology images, and laboratory test results. These digital systems offer numerous advantages, including improved patient care, enhanced clinical decision-making and streamlined healthcare processes [3].

While the adoption of EHRs is widespread across various healthcare settings, their implementation within military healthcare systems brings unique challenges and opportunities [4]. Military healthcare systems necessitate specialized medical care to cater to the distinct health needs and challenges encountered by military personnel, including combat injuries, mental health issues, and the repercussions of deployment. It is imperative for military healthcare systems to guarantee easy accessibility to healthcare services for national guard and reservist roles, veterans, and their families, irrespective of their location or deployment status. Ensuring continuity of care is essential as military personnel may frequently relocate due to deployments, reassignments, or transitions to civilian life [5].

The upkeep of the health and readiness of national guard and reservist roles is a top priority for military healthcare systems to ensure they are physically and mentally prepared for their duties. These systems must be appropriately equipped to provide trauma care for combat injuries and emergencies during military operations. Comprehensive mental health services must also be offered to address the unique stressors and mental health challenges experienced by military personnel. Emphasis on preventive care is crucial to promote overall health and well-being and prevent injuries and illnesses in the military population. Investment in research and innovation is vital to continually enhance medical treatments and technologies for the benefit

of military personnel. Collaboration with civilian healthcare providers may be necessary to ensure seamless care for military personnel and their families, particularly during transitions to civilian life or when stationed in remote areas. Adequate funding, staffing, facilities, and equipment are indispensable for military healthcare systems to effectively meet the diverse healthcare needs of military personnel and their families [6,7].

Military healthcare systems are responsible for providing health and medical care to military personnel, including active-duty service members, veterans, and their dependents. These systems operate in diverse and often complex settings, ranging from military bases to combat zones, and are designed to ensure the health and well-being of military personnel both during peacetime activities and in times of conflict. The provision of high-quality healthcare services is essential for safeguarding the health, well-being, and operational readiness of military forces [5].

The integration of EHRs in military healthcare systems offers the potential to revolutionize medical practices within these specialized contexts. By replacing traditional paper-based records with digital systems, EHRs enable healthcare providers to access comprehensive patient information in real-time, regardless of their location [6]. This accessibility can prove crucial, particularly in military deployments or emergency situations where rapid access to accurate medical data can enable efficient diagnosis, treatment, and monitoring of military personnel and significantly impact patient outcomes [7].

The necessary integrations for a military EHR system include the ability to communicate with other military healthcare systems, robust encryption and authentication measures to protect sensitive patient information, tracking and managing the health status of deployed service members, and modules for monitoring military-specific health concerns. It is important for the military EHR system to be customized to meet the unique needs of military healthcare providers and patients in order to ensure efficient delivery of healthcare services [6].

However, implementing EHRs in military healthcare settings presents unique challenges. These challenges encompass technical considerations, such as deploying and integrating EHR systems across different military branches, ensuring interoperability between military and civilian healthcare providers, and addressing data security and privacy concerns in sensitive military environments [8]. Moreover, the specific requirements of military healthcare, including the need for adaptability to different operational contexts and compatibility with deployed medical facilities, necessitate tailored solutions for successful EHR implementation [9].

To date, the literature on EHR utilization in military healthcare systems remains limited and fragmented. A comprehensive review of existing studies is therefore essential to gain a comprehensive understanding of the impact and effectiveness of EHRs within military healthcare settings. By conducting a systematic review, this manuscript aims to address this gap in knowledge and provide an in-depth analysis of the benefits, challenges, and best practices associated with employing EHRs in military healthcare settings.

The objectives of this systematic review are two-fold: firstly, to evaluate the impact of EHRs on healthcare outcomes, patient safety, and resource management within military healthcare systems; secondly, to identify the key barriers, lessons learned, and best practices for successful EHR implementation in military contexts. By synthesizing the available evidence, this review aims to inform policymakers, healthcare providers, and researchers in optimizing EHR utilization to enhance the quality, efficiency, and effectiveness of healthcare services for military personnel and their dependents. Overall, this manuscript aims to provide a comprehensive understanding of the utilization of Electronic Health Records in military healthcare systems. By examining the unique challenges and opportunities associated with adopting EHRs in these specialized contexts, this systematic review strives to facilitate evidence-based decision-making and facilitate the advancement of healthcare within military settings.

## Materials and methods

This review adhered to the preferred reporting items for systematic reviews and meta-analyses (PRISMA) guidelines, which provide a standardized set of criteria for reporting systematic reviews and meta-analyses. While PRISMA is primarily designed for reviews evaluating intervention effects, it can also be used for studies addressing other objectives such as etiology, prevalence, diagnosis, or prognosis. The goal of PRISMA is to enhance the clarity and quality of reporting in systematic reviews. Additionally, it can be useful for critically appraising existing reviews, though it does not serve as a tool for assessing their overall quality [10].

## Information source

Studies were identified up to July 20, 2024, through a comprehensive search conducted across several online databases including PubMed, Web of Science, Scopus, IEEE, ProQuest, MEDLINE, Cochrane Library, Embase, SID, and ISC. The search encompassed online books, published papers, conference abstracts, seminar and reference publications to minimize publishing bias and ensure the inclusion of a significant number of articles. Moreover, the reference lists of selected articles were examined for additional relevant studies. Additionally, manual searches were conducted in the bibliographies of articles and reviews. To stay updated, an email alert system was set up in the electronic databases, monitoring new publications that met the selection criteria based on the saved search history as of July 20, 2024.

## Eligibility criteria

Two reviewers (A TM and L Gh) independently evaluated the titles of the articles. The articles were divided into two categories: "definitely exclude" and "possibly include." The abstracts of the articles in the "possibly include" category were evaluated. Studies that had abstracts that didn't meet the inclusion criteria were excluded. The entire text of the remaining articles was examined, and any duplicate articles were removed. Articles were considered eligible if they reported on implementation, development, validation, or translation studies of electronic health records in the context of military healthcare systems. Only articles written in English and with full-text accessibility were included. Letters to the editor, commentary, review, and opinion papers were excluded. There was no restriction on the publication year.

## Search strategy

The search terms were generated based on the ideas or concepts mentioned in the research objective: Electronic Medical Record(s), Electronic Health Record(s), Computerized Medical Record(s), Automated Medical Record(s), Medical Record System(s), Patient Record System, Patient Management System, Armed force, Army, Military, Air Force, Navy and Healthcare. The syntax of search strategy was produced in Table 1. The search strategy was approved by a

**Table 1. The syntax of search strategy.**

|           |                                                                                                                                                                                                                                             |
|-----------|---------------------------------------------------------------------------------------------------------------------------------------------------------------------------------------------------------------------------------------------|
| Databases | PubMed, Web of Science, Scopus, IEEE, ProQuest, MEDLINE, Cochrane Library, Embase, SID, and ISC.                                                                                                                                            |
| Date      | up to 2024-7-20                                                                                                                                                                                                                             |
| Strategy  | #1 AND #2 AND #3                                                                                                                                                                                                                            |
| #1        | ("Electronic Medical Record" OR EMR OR "Electronic Health Record" OR EHR OR "Computerized Medical Record" OR CMR OR "Automated Medical Record" OR AMR OR "Medical Record System" OR "Patient Record System" OR "Patient Management System") |
| #2        | (Army OR Military OR "Armed force" OR "Air Force" OR Navy)                                                                                                                                                                                  |
| #3        | Healthcare                                                                                                                                                                                                                                  |

<https://doi.org/10.1371/journal.pone.0313641.t001>

medical librarian and information specialist. Also, the authors confirm that the search strategy is not pre-registered.

Initially, articles that might be relevant were chosen primarily based on their titles and imported into Endnote. Subsequently, a more refined selection process was conducted, considering the abstracts and full texts of the articles.

### Data collection process

The reviewers (A TM, M B, A DM and L Gh) independently reviewed the full text of the selected articles. A standardized data extraction form was utilized to extract relevant information from these articles. The data extraction sheet for each study encompassed details including authors, year, country, research objective, architecture and components, setting, included processes, standards used, platform and technology, extent of implementation, interoperability aspect, challenges, information resource, and key findings. The results from all the selected studies were gathered and compiled. To ensure accuracy and completeness of the data entries, another independent investigator reviewed and verified them. There was no missing data in the present study.

### Quality assessment

To support the inclusion/exclusion process, an assessment and analysis were conducted to evaluate the quality of the initially selected studies. The critical appraisal tool used for this purpose was the Quality Assessment of Diagnostic Accuracy Studies (QUADAS) checklist. This tool is specifically designed to assess the reliability and validity of combined studies or to evaluate validity and reliability as separate components [11].

The checklist consists of 14 questions, each with three options: yes, no, and unclear. Two researchers thoroughly evaluated all the identified studies for potential bias. During the assessment, if a study provided information corresponding to each checklist question, it was scored as "yes." If the study did not clearly report the required information, the item was scored as "no." In cases where the information provided was incomplete, the item was scored as "unclear." Based on previous research, a score of 7 out of 14 or higher, with the majority of items scored as "yes," indicated a high-quality study, while scores below 7 indicated a low-quality study. All discrepancies between the researchers' assessments were resolved through agreement.

To present the results, various software tools were utilized, including Excel, XMind, an online word cloud generator, and the yED graph editor.

### Results

[Fig 1](#) illustrates a flow diagram that follows the PRISMA guidelines, providing a detailed overview of the article selection process. Initially, a total of 9618 titles were obtained from various databases. After eliminating duplicate articles, 6051 titles remained. Two reviewers carefully evaluated the titles for relevance, resulting in the exclusion of 5503 articles that were deemed irrelevant to the review topic. Out of the remaining titles, 548 articles were selected based on their titles. The abstracts of these articles were then analyzed, leading to the exclusion of 334 articles that did not meet the eligibility criteria. As a next step, a total of 214 full-text articles were retrieved and assessed against the eligibility criteria. Following the assessment, 185 articles were excluded (please refer to [Fig 1](#) for further details), and ultimately, 29 articles were included in the review. [Fig 2](#) shows global trends in electronic health records.

The results indicate that the majority of the studies were conducted at the Department of Defense level, with the goal of cost savings, increased user satisfaction, improved care, patient



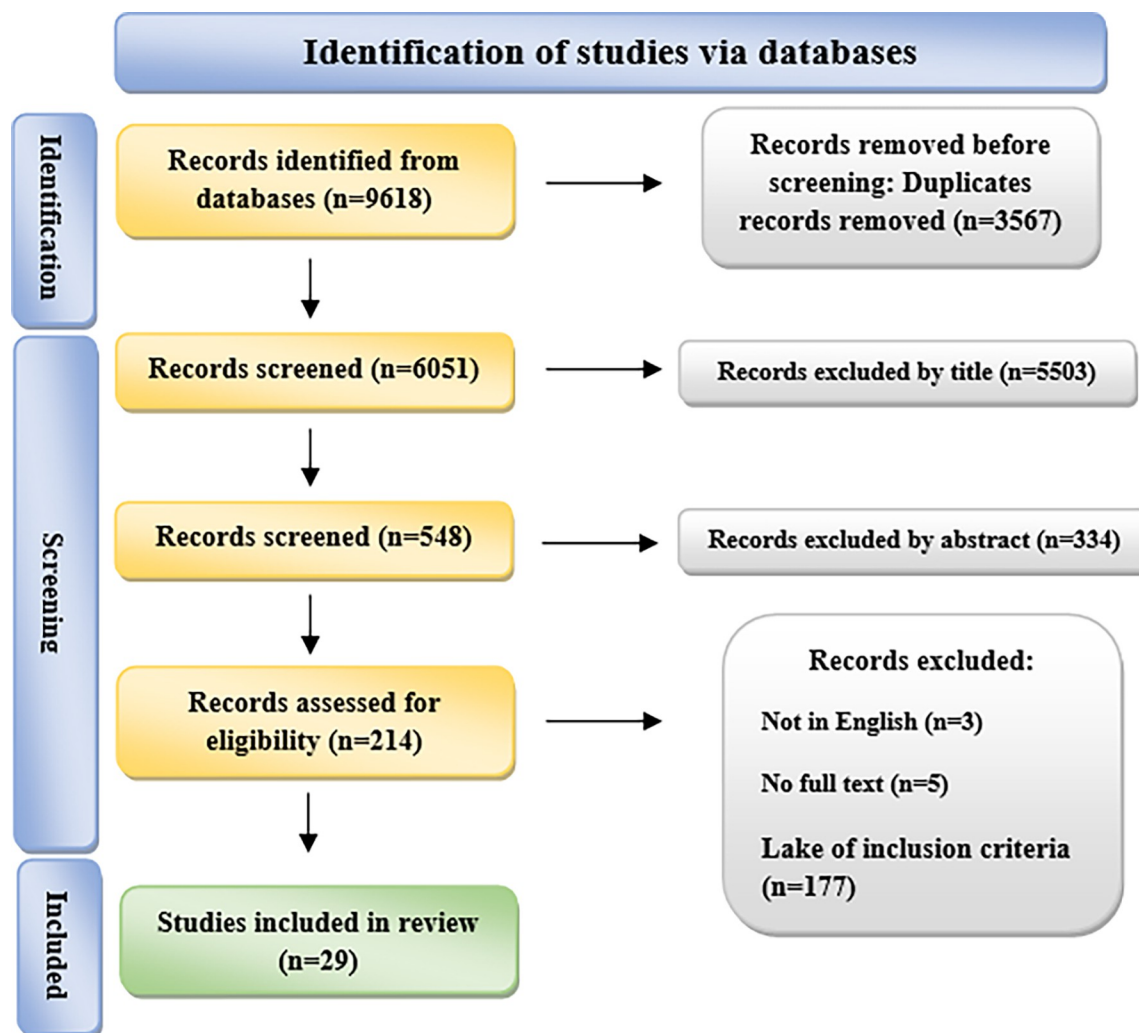

Fig 1. PRISMA flow diagram.

<https://doi.org/10.1371/journal.pone.0313641.g001>

safety and communications, and the transition to a modern, value-based managed care system and integrated healthcare delivery. Other objectives included the reducing medical errors, exchange of health information, improved access to information, and maintaining confidentiality and security of information. Additionally, the studies aimed to improve the quality, quantity, and completeness of information, empower patients and treatment staff, and promote clinical research. Most of the studies were conducted in hospitals and clinics within the United States.

Furthermore, the studies reported on various processes such as clinical documentation, appointment setting, e-prescribing, querying, data mapping, disease surveillance, telemedicine, decision support, computerized physician order entry (CPOE), and information management. The interoperability between systems was predominantly at the semantic level and relied on the Military Health System as the primary information source. Fig 3 summarizes the different components of information resources in the EHR that are mentioned in studies.

The most commonly used transport standard was health level seven fast healthcare interoperability resources (HL7 FHIR), the most frequently used content standard was clinical document architecture (CDA), and the most commonly used terminology standards were

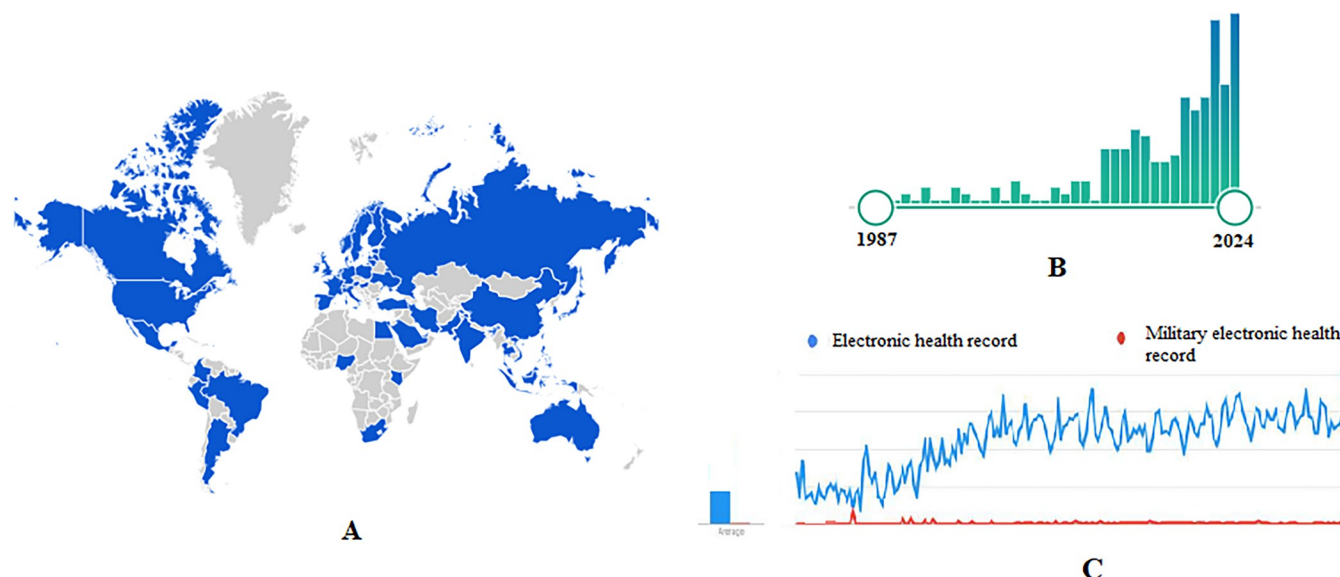

**Fig 2.** (A) Geographical scope in the subject of electronic health record in the world based on the google search (B) The growth trend of articles in the field of military electronic health record in databases (C) The comparison of the google search trend of electronic health record and military electronic health record.

<https://doi.org/10.1371/journal.pone.0313641.g002>

international classification of diseases ninth revision (ICD 9) and international classification of diseases tenth revision (ICD 10). Additionally, the most commonly used security standards were health insurance portability and accountability act (HIPAA), and the most frequently used technical standards were international organization for standardization technical committees (ISO TC). In the majority of the studies, software development kits (SDKs) were utilized as development platforms for electronic health records. Among modern architectural approaches, web-based architecture was the most commonly used.

The most significant challenges reported in the implementation of EHR included resistance to change, privacy and security concerns, a wide range of architectural options and capabilities, unclear support policies and procedures, the sensitive military application environment, infrastructure limitations, user training difficulties, time and financial costs, challenges in creating scalability and reusability, a variety of health data types and their large volume, as well as concerns about interoperability. Details of the selected studies in this study are given in Table 2.

## Discussion

In recent years, the EHR has experienced significant growth, capturing the interest of researchers globally. A comparison between the general EHR topic and the military-specific EHR topic reveals that the scope of the former far surpasses that of the latter. However, findings from the study indicate that the subject of EHR in the armed forces has been a topic of discussion since 1987. Presently, it remains an area of keen interest for researchers (refer to Fig 2). In addition, the use of EHR has also grown significantly in the world in recent years. There are several reasons for this trend:

1. Improved Data Management: EHRs allow healthcare providers to store, retrieve, and share patient data efficiently. This leads to better coordination of care and enhances the overall quality of healthcare services.

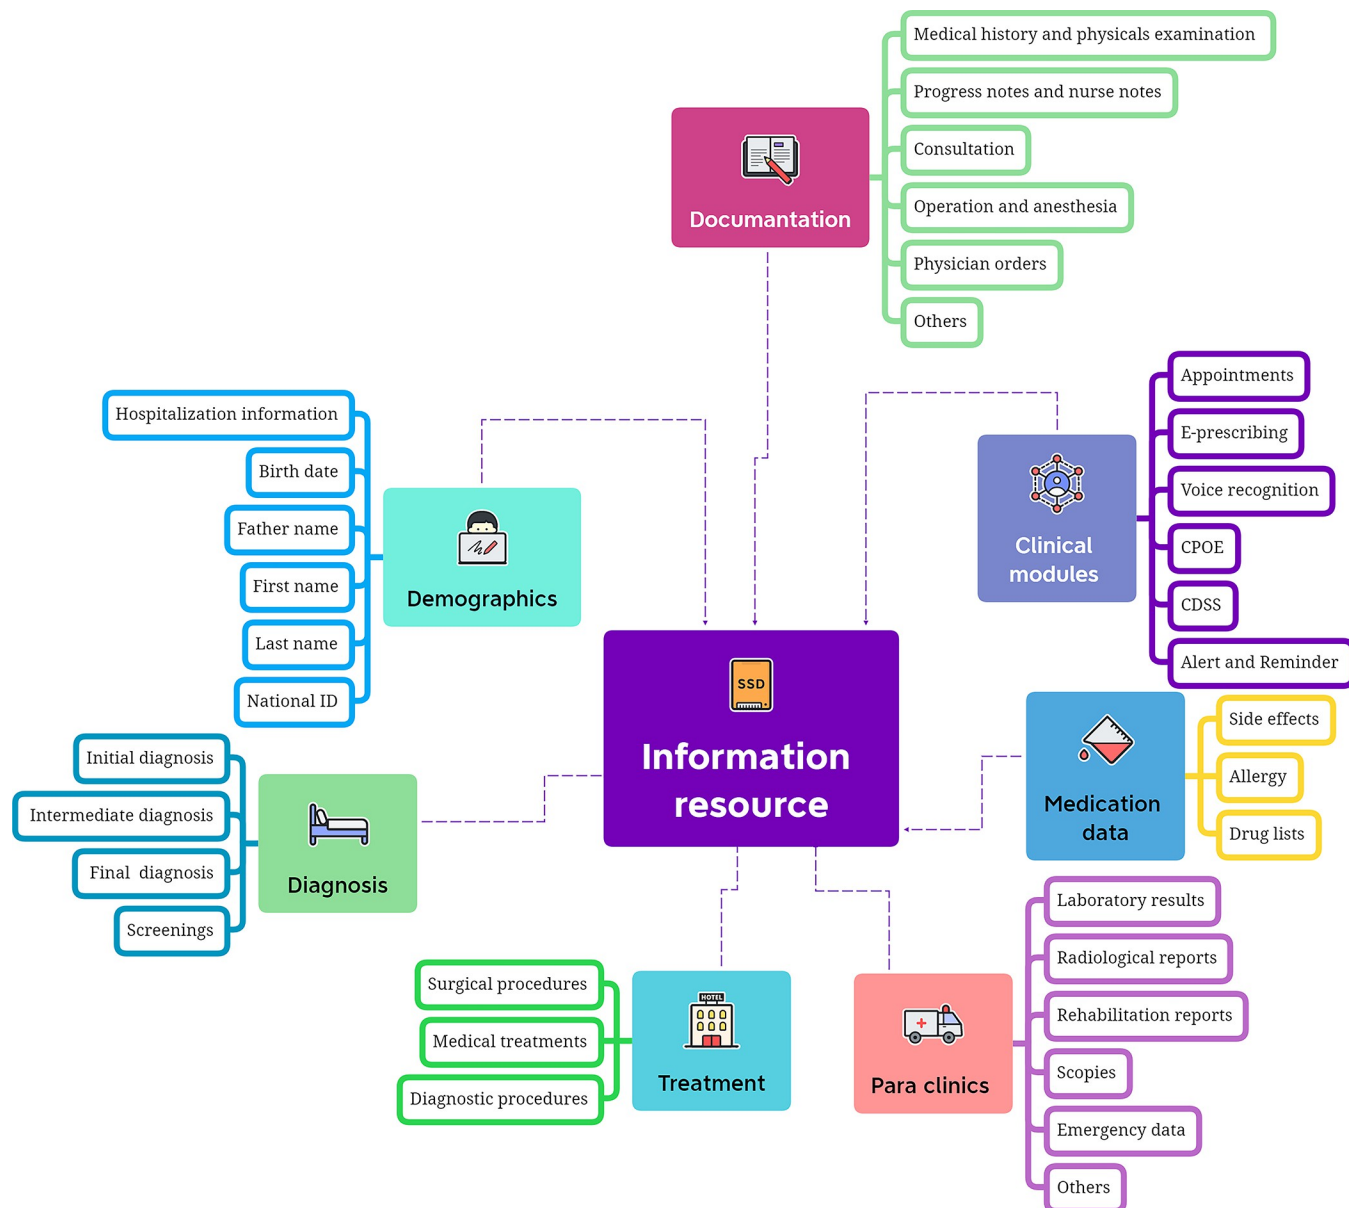

**Fig 3. Summary of EHR information resources components based on findings.**

<https://doi.org/10.1371/journal.pone.0313641.g003>

2. **Accessibility:** EHRs enable healthcare professionals to access patient information across different healthcare settings, facilitating continuity of care. Accessibility ensures seamless data exchange between systems, promoting better collaboration among healthcare providers.
3. **Research Opportunities:** EHRs provide researchers with an abundance of comprehensive and structured data for study and analysis. This wealth of information can help identify trends, patterns, and potential insights into improving healthcare outcomes and treatment effectiveness.
4. **Cost Reduction:** Electronic health records can potentially reduce healthcare costs by minimizing paperwork, streamlining workflows, and mitigating medical errors. This is



Table 2. Details of the selected studies.

| Authors and Year              | Country       | Research objective                                                                                             | Challenges                                                                                                                                                                                                  | Architecture and components   | Setting               | Included processes                                                                                                                                            | Used standards            | Platform and technology                                                                                       | Extent of implementation     | Interoperability aspect | Information resource                                                                                                                                                                                                                                                                                                                                                                                    | Key findings                                                                                                                                                        | QUADAS score and risk of bias |
|-------------------------------|---------------|----------------------------------------------------------------------------------------------------------------|-------------------------------------------------------------------------------------------------------------------------------------------------------------------------------------------------------------|-------------------------------|-----------------------|---------------------------------------------------------------------------------------------------------------------------------------------------------------|---------------------------|---------------------------------------------------------------------------------------------------------------|------------------------------|-------------------------|---------------------------------------------------------------------------------------------------------------------------------------------------------------------------------------------------------------------------------------------------------------------------------------------------------------------------------------------------------------------------------------------------------|---------------------------------------------------------------------------------------------------------------------------------------------------------------------|-------------------------------|
| Bar-Dayan Y, et al. 2013 [12] | Israel        | Use of EHR to cost saving.                                                                                     | It was difficult to make changes.                                                                                                                                                                           | Web-based                     | All specialty clinics | Clinical documentation, management of referral system, appointment setting, e-prescribing, exchange of information, and submission of quality measures to CMS | HL7 FHIR                  | Computer, windows form generator                                                                              | Israeli Defense Forces       | Semantic                | EHR meaningful use<br>1. Clinical documentation: patient demographic, medication lists, physicians' notes (eg, medical history and follow-up), problem lists<br>2. Test and imaging results: laboratory reports, radiological reports<br>3. Computerized provider order entry: consultation requests, e-prescribing<br>4. Decision support: clinical guidelines, drug-allergy alerts, drug-dose support | EHR can facilitate effective utilization of healthcare providers and decrease costs.                                                                                | 9 (low risk)                  |
| Do NV, et al. 2011 [13]       | United States | Design, build, implement, and evaluate a PHR, tethered to the Military Health System based on user preference. | Regardless of model design, implementation challenges were formidable given barriers and debate on key issues such as privacy and security, architecture options, functionalities, and supporting policies. | Service-oriented architecture | Hospitals, clinics    | Clinical documentation, exchange of information, query, data mapping                                                                                          | CCD, CCR, HIPAA, HL7, CDA | Google Health, Microsoft HealthVault, laptop, server and sql server, SOAP, API, SDK, Microsoft.NET, XML, HTML | Madigan Army Medical Centers | Semantic                | Military Health System<br>1. Laboratory results<br>2. Allergies<br>3. Medications<br>4. Radiology reports<br>5. Appointments<br>6. Medical procedures<br>7. Medical problems list<br>8. Consultation reports<br>9. Inpatient notes<br>10. Outpatient encounter notes                                                                                                                                    | PHR is a powerful tool for patient activation. Adopting standards into design can enhance the national goal of portability and interoperability.                    | 10 (low risk)                 |
| Spott MA, et al. 2018 [14]    | United States | Use of EHR for improvement of trauma care.                                                                     | Typically, the military capture of the medical record in a deployed environment is challenging.                                                                                                             | Web-based                     | Hospitals             | Clinical documentation, communication between healthcare providers, research                                                                                  | ICD 9/10, HIPAA           | SDK                                                                                                           | Department of Defense        | Structural              | Military Health System<br>1. demographics<br>2. treatments<br>3. outcomes<br>4. injury                                                                                                                                                                                                                                                                                                                  | By employing high data acquisition standards and automated identification issues, the EHR offers an increased chance to trend information and improve patient care. | 8 (low risk)                  |

(Continued)

Table 2. (Continued)

| Authors and Year                | Country       | Research objective                                                                                              | Challenges                                                                                                                                                                                                                                         | Architecture and components   | Setting                | Included processes                                      | Used standards   | Platform and technology                                                                                                            | Extent of implementation | Interoperability aspect | Information resource                                                                                                                                                                                                                                                                                                               | Key findings                                                                                                                                                                                                                                                                                      | QUADAS score and risk of bias |
|---------------------------------|---------------|-----------------------------------------------------------------------------------------------------------------|----------------------------------------------------------------------------------------------------------------------------------------------------------------------------------------------------------------------------------------------------|-------------------------------|------------------------|---------------------------------------------------------|------------------|------------------------------------------------------------------------------------------------------------------------------------|--------------------------|-------------------------|------------------------------------------------------------------------------------------------------------------------------------------------------------------------------------------------------------------------------------------------------------------------------------------------------------------------------------|---------------------------------------------------------------------------------------------------------------------------------------------------------------------------------------------------------------------------------------------------------------------------------------------------|-------------------------------|
| Khan S. 2018 [15]               | United States | Shift toward a modern value-based managed care system, which requires much more integrated healthcare delivery. | Building infrastructure, unified clinical leadership and health system reform are challenging.                                                                                                                                                     | Service-oriented architecture | Hospitals, clinics     | Exchange of information, data analytics                 | HL7 FHIR         | SDK                                                                                                                                | Department of Defense    | Semantic                | Military Health System<br>1. demographics<br>2. drug prescriptions<br>3. diagnoses<br>4. treatment<br>5. paraclinic                                                                                                                                                                                                                | Key outcomes from this effort include health quality improvement based on national standards, greater efficiency with reduced care variation and medical error prevention, improved population health outcomes and early disease detection, and prevention and treatment activities among others. | 11 (low risk)                 |
| Hoyt R, Yoshihashi A. 2010 [16] | United States | Implementation of voice recognition for documenting outpatient encounters in the EHR.                           | Training, inaccuracies, missing error and time wasted correcting notes are challenging.                                                                                                                                                            | Web-based                     | Hospitals, clinics     | Clinical documentation                                  | SNOMED-CT, AHIMA | Voice recognition software (Dragon NaturallySpeaking), computer hardware (RAM, CPU, headset microphone), mobile, wireless settings | Department of Defense    | Technical               | EHR meaningful use<br>1. clinical elements                                                                                                                                                                                                                                                                                         | Software was accurate, was faster than typing, improved note quality, and permitted closing a patient encounter the same day.                                                                                                                                                                     | 11 (low risk)                 |
| Chretien JP, et al. 2016 [17]   | United States | Health information exchange for study the long term health consequences of military services.                   | Securing participation from separating service members, need for political will to implement the program and establishing ethically appropriate and technically feasible procedures for obtaining informed consent to participate are challenging. | Web-based                     | All healthcare centers | Exchange of information, disease surveillance, research | HL7 FHIR         | Internet, computer, network settings                                                                                               | Department of Defense    | Semantic                | Military service records<br>1. demographic and occupational characteristics<br>2. immunizations<br>3. clinical medical encounters (outpatient and inpatient)<br>4. laboratory testing<br>5. deployment, pre- and post-deployment health assessments<br>6. reportable medical event reports<br>7. casualties of all service members | Knowledge of the health effects of military service improves; the health information exchange infrastructure could accelerate application of this knowledge to clinical practice at the point of care.                                                                                            | 8 (low risk)                  |

(Continued)

Table 2. (Continued)

| Authors and Year                   | Country       | Research objective                                                                                                                                             | Challenges                                                                                                                                                                         | Architecture and components   | Setting                | Included processes                                                                                                | Used standards                   | Platform and technology                                                                                                                                                                                                                                     | Extent of implementation | Interoperability aspect | Information resource                                                                                                                                                 | Key findings                                                                                                                                                                                                                                                                                                                                    | QUADAS score and risk of bias |
|------------------------------------|---------------|----------------------------------------------------------------------------------------------------------------------------------------------------------------|------------------------------------------------------------------------------------------------------------------------------------------------------------------------------------|-------------------------------|------------------------|-------------------------------------------------------------------------------------------------------------------|----------------------------------|-------------------------------------------------------------------------------------------------------------------------------------------------------------------------------------------------------------------------------------------------------------|--------------------------|-------------------------|----------------------------------------------------------------------------------------------------------------------------------------------------------------------|-------------------------------------------------------------------------------------------------------------------------------------------------------------------------------------------------------------------------------------------------------------------------------------------------------------------------------------------------|-------------------------------|
| Giannakopoulou O, et al. 2021 [18] | Greece        | Digitalize the medical examination procedure of recruitment phase of conscripts in the Hellenic Navy.                                                          | The challenge is that the delay in process is not decreased; however this is done for the benefit of the quality which increases significantly.                                    | Web-based                     | Military medical units | Telemedicine, screening, advising, decision making, diagnosing, prediction, medical data collection and recording | Advanced Encryption Standard     | Digital tools, database, machine learning, medical devices, computer, API, Barcode, bluetooth, printer                                                                                                                                                      | Hellenic Navy            | Technical               | National health care association test (cardiovascular risk data)<br>1. pre-screening<br>2. demographics<br>3. personal and family medical history                    | eMass solution contributes to beneficial management and medical data analysis, preventing inessential physical or medical examinations minimizing danger of possible errors and reducing time-consuming processes. Moreover, eMass exploits Electronic Health Record data through a machine learning based cardiovascular risk assessment tool. | 12 (low risk)                 |
| Jingquan L. 2017 [19]              | United States | Present a SOA-based approach for the integration of EHR systems and PHR systems and identify the primary focus areas for interoperable and secure PHR systems. | Interoperability, reusability, and scalability along with security and privacy are challenging.                                                                                    | Service-oriented architecture | Hospitals, clinics     | Collect, store, use, share of information, computerized physician order entry, clinical decision support          | HL7, CDA, HIPAA, HITECH, IHE XDS | Patients Like Me, 23 and Me, Microsoft HealthVault, Google genomics for personal health information management, wearable devices, computers, smart phones, mHealth devices, inter-organizational service bus, SOAP, REST, web services, Oracle, Vista, WSDL | Department of Defense    | Semantic                | Military Health System<br>1. medical records<br>2. lab and radiology results<br>3. medications<br>4. self-entered health information                                 | PHR will empower individuals to manage their own health care, reduce medical errors, improve communications with doctors, lower health care costs, and provide vital and complete information for emergency care.                                                                                                                               | 13 (low risk)                 |
| Singla M, et al. 2020 [20]         | United States | Use of ICD-9-CM codes in EHR to increase diagnostic accuracy in inflammatory bowel disease.                                                                    | Using "practical" or "retrospective" diagnoses rather than confirmed diagnoses is challenging.                                                                                     | Web-based                     | Hospitals              | Research, clinical documentation                                                                                  | ICD-9-CM, ICD 10                 | SDK                                                                                                                                                                                                                                                         | Department of Defense    | Semantic                | Military Health System<br>1.procedures<br>2. diagnosis<br>3. demographic<br>4. medical history<br>5. medications<br>6.colonoscopy, radiological studies and lab test | The results showed that poor codes for inflammatory bowel disease had improved greatly.                                                                                                                                                                                                                                                         | 9 (low risk)                  |
| Sloane E, et al. 2007 [21]         | United States | Development of EHR to support decisions and to improve the quality, quantity, and completeness of information available to physicians.                         | Healthcare depends on multiple disparate care-delivery providers, each using specialized computer systems for optimal clinical data and practice management, which is challenging. | Service-oriented architecture | Hospital               | Exchange of information                                                                                           | HIPAA, HL7 FHIR                  | XML                                                                                                                                                                                                                                                         | Department of Defense    | Semantic                | National Healthcare Information Network<br>1. demographics<br>2. drug prescriptions<br>3. diagnoses<br>4.treatment<br>5. paraclinic                                  | These features could be used to improve individual and aggregate static data exchange between healthcare centers and improve a patient's care.                                                                                                                                                                                                  | 10 (low risk)                 |

(Continued)

Table 2. (Continued)

| Authors and Year              | Country       | Research objective                                                                                                                                                                | Challenges                                                                                                                                                                                                        | Architecture and components | Setting                     | Included processes                                                                                 | Used standards     | Platform and technology                                                                                                       | Extent of implementation               | Interoperability aspect | Information resource                                                                                                                                         | Key findings                                                                                                                                                                                                     | QUADAS score and risk of bias |
|-------------------------------|---------------|-----------------------------------------------------------------------------------------------------------------------------------------------------------------------------------|-------------------------------------------------------------------------------------------------------------------------------------------------------------------------------------------------------------------|-----------------------------|-----------------------------|----------------------------------------------------------------------------------------------------|--------------------|-------------------------------------------------------------------------------------------------------------------------------|----------------------------------------|-------------------------|--------------------------------------------------------------------------------------------------------------------------------------------------------------|------------------------------------------------------------------------------------------------------------------------------------------------------------------------------------------------------------------|-------------------------------|
| Friedman DR, et al. 2022 [22] | United States | Integration of patient-reported outcome data into EHR to bring together disparate sources of patient information and improve medical care.                                        | Integration of patient-reported outcome data is challenging, because requiring consideration of heterogeneity of data sources, patient population, data display, provider education, and guidelines and pathways. | Web-based                   | hematology-oncology clinics | Documenting of cancer-related data, exchange of information                                        | ICD-9-CM, ICD-10   | Registry system                                                                                                               | Veteran administration medical centers | Semantic                | Veteran Symptom Assessment System<br>1. Patient demographic data<br>2. laboratory data<br>3. radiologic data<br>4. disease<br>5. symptom and sign            | With this method, it is possible to identify patients who are experiencing severe, long-term or multiple symptoms in real time and provide immediate intervention and improve the quality of life.               | 11 (low risk)                 |
| Smith B, et al. 2008 [23]     | United States | Self-reporting of medical conditions with EMR.                                                                                                                                    | Patient-clinician communication, multiple data sources and health literacy of the patient are challenging.                                                                                                        | Web-based                   | Hospitals, clinics          | Documenting of medical-related data, exchange of information                                       | ICD-9-CM           | Registry system                                                                                                               | Department of Defense                  | Semantic                | Military Health System<br>1. Patient demographic<br>2. medical conditions<br>3. diagnosis<br>4. medical treatment                                            | Data integrity increased within the medical record information with this approach.                                                                                                                               | 12 (low risk)                 |
| Li L, et al. 2014 [24]        | China         | Improvement of electronic health records and health promoting.                                                                                                                    | There are problems, such as optimization of system structure, perfection of business function, unity of standard and system.                                                                                      | Web-based                   | All healthcare centers      | Decision support, data collection, summarizing, statistics, demonstration, exchange of information | ISO/TS 18308: 2004 | Satellite communication network, wired and wireless network, Oracle data base, digital signature, server                      | Ministry of health of China            | Technical               | Institute of Health Service and Medical Information<br>1. health information<br>2. data dictionary<br>3. patient demographic<br>4. medical treatment service | Construction of this system achieves various health data integration, completes health evaluation criterion, enforces standard health management process, and makes full use of information and health resource. | 9 (low risk)                  |
| Wong KH, et al. 2020 [25]     | United States | Accurate documentation of injuries and treatments to improve of care, both in the immediate post injury phase and the longer-term recovery.                                       | Support different equipment's, low bandwidth and communication future expansions are challenging.                                                                                                                 | Web-based                   | All healthcare centers      | Documenting of medical-related data, telemedicine, exchange of information                         | ICD 10             | Sensors, wireless communication, dedicated keyboard, bar code scanner, cables, mobile, Bluetooth, audio and imaging hardware, | Department of Defense                  | Semantic                | Military Health System<br>1. demographics<br>2. medical data<br>3. paraclinics<br>4. references<br>5. share                                                  | The widespread deployment of this type of device will enable more effective health care, limit the impact of battlefield injuries, and save lives.                                                               | 11 (low risk)                 |
| Blosnich JR, et al. 2020 [26] | United States | Determination of the prevalence of social determinants of health documentation in the EHR and how social determinants of health are associated with suicide ideation and attempt. | Interagency data sharing to enrich health services research is challenging.                                                                                                                                       | Web-based                   | All healthcare centers      | Documenting of medical-related data, exchange of information                                       | ICD 10             | Network settings                                                                                                              | Department of Defense                  | Semantic                | Veterans Health Administration<br>1. sociodemographic<br>2. mental health data                                                                               | Integration of social determinants of health data in EHR could improve suicide prevention.                                                                                                                       | 12 (low risk)                 |

(Continued)

Table 2. (Continued)

| Authors and Year                       | Country       | Research objective                                                                                              | Challenges                                                                                                                                                                         | Architecture and components   | Setting               | Included processes                                           | Used standards                           | Platform and technology                                                                        | Extent of implementation   | Interoperability aspect | Information resource                                                                                                                               | Key findings                                                                                                                                                       | QUADAS score and risk of bias |
|----------------------------------------|---------------|-----------------------------------------------------------------------------------------------------------------|------------------------------------------------------------------------------------------------------------------------------------------------------------------------------------|-------------------------------|-----------------------|--------------------------------------------------------------|------------------------------------------|------------------------------------------------------------------------------------------------|----------------------------|-------------------------|----------------------------------------------------------------------------------------------------------------------------------------------------|--------------------------------------------------------------------------------------------------------------------------------------------------------------------|-------------------------------|
| Thériault EL, et al. 2022 [27]         | Canada        | Use of Electronic Medical Record data to identify new diagnoses of major depression and spinal pain.            | This study was limited to pain and depression models, which is a challenge and comprehensive models are needed.                                                                    | Web-based                     | Hospitals             | Documenting of medical-related data, exchange of information | ICD 10, DSM-5                            | SDKs                                                                                           | Canadian Armed Forces      | Semantic                | 1. demographics<br>2. mental health data<br>3. brain and nerve problems data                                                                       | Results highlight the importance of correcting for misclassification in electronic medical record data research.                                                   | 13 (low risk)                 |
| Rockswold PD and Finnell VW. 2010 [28] | United States | Use of predictors' tools to upgrade the system and increase user satisfaction.                                  | Slow screen refresh rate, computer literacy, lack of buy-in from end users, effects on clinical staff efficiency and effects on clinician-patient communication cited as problems. | Web-based                     | Hospitals and clinics | Documenting of medical-related data                          | ICD 10                                   | Templates, tablet, wireless networks, computer                                                 | Department of Defense      | Structural              | Military Health System<br>1. demographics<br>2. order set<br>3. diagnosis                                                                          | Training, duration of usage, and provider role are associated with use of advanced features.                                                                       | 14 (low risk)                 |
| Silva R, et al. 2017 [29]              | Ecuador       | Development of compatible approach to interoperate EHR.                                                         | Interoperability issues are challenging.                                                                                                                                           | Service Oriented Architecture | Hospitals and clinics | Documenting of medical-related data, exchange of information | ISO 13606, SNOMED CT, ISO TC 215, ICD-10 | PostgreSQL, hibernate, spring, java script, XML, API, WSDL, SOAP, Link EHR ED, Free Mind, HTML | Ministry of Public Health  | Semantic                | ISO Archetype<br>1. demographics<br>2. clinical data<br>3. emergency data<br>4. paraclinical data                                                  | The present approach will contribute to promote the interoperability of the medical records implemented in Ecuador, which will improve the quality of health care. | 12 (low risk)                 |
| Wilk JE, et al. 2016 [30]              | United States | Recording diagnoses and treatment factors related to post-traumatic stress disorder in the EHR.                 | Not recording was challenging due to stigma reduction or career protection.                                                                                                        | Web-based                     | Clinics               | Documenting of medical-related data                          | DSM-5, ICD 9                             | SDKs                                                                                           | Department of Defense      | Technical               | Military Health System<br>1. demographics<br>2. treatment<br>3. diagnosis                                                                          | Despite the benefits of recording information in EHR, some doctors still do not record information in it.                                                          | 9 (low risk)                  |
| Reimer RJ, et al. 2023 [31]            | United States | Assembling an EHR dataset for a large cohort of military Veterans diagnosed with amyotrophic lateral sclerosis. | Managing huge amounts of data is difficult.                                                                                                                                        | Web-based                     | Hospitals             | Documenting of medical-related data                          | ICD 9, ICD 10                            | Python library                                                                                 | Department of Defense      | Semantic                | Veterans Health Administration<br>1. demographics<br>2. diagnoses<br>3. vital signs<br>4. paraclinical values<br>5. prescriptions<br>6. procedures | EHR data are an invaluable source for clinical information and can be useful for understanding diseases and their treatments when analyzed appropriately.          | 12 (low risk)                 |
| Ladan A and Daura UD. 2015 [32]        | Nigeria       | Creating and maintaining and managing patients' medical records in electronic form                              | Lack of Information and communications technology facilities, absent of finding aids, inadequate space and storage facilities are the challenges.                                  | Web-based                     | Hospitals             | Documenting and managements of medical-related data          | ISO 13606                                | SOAP                                                                                           | Nigeria military hospitals | Technical               | 1. demographics<br>2. diagnoses<br>3. patient's complaints<br>4. paraclinical values<br>5. procedures and treatments                               | The use of EMR leads to overcoming the challenges of traditional methods of records management.                                                                    | 11 (low risk)                 |

(Continued)



Table 2. (Continued)

| Authors and Year               | Country                  | Research objective                                                                                                                                                     | Challenges                                                                                                                                                         | Architecture and components | Setting               | Included processes                                                                                         | Used standards         | Platform and technology                                 | Extent of implementation                      | Interoperability aspect | Information resource                                                                                                                                                                           | Key findings                                                                                                                                                                                                   | QUADAS score and risk of bias |
|--------------------------------|--------------------------|------------------------------------------------------------------------------------------------------------------------------------------------------------------------|--------------------------------------------------------------------------------------------------------------------------------------------------------------------|-----------------------------|-----------------------|------------------------------------------------------------------------------------------------------------|------------------------|---------------------------------------------------------|-----------------------------------------------|-------------------------|------------------------------------------------------------------------------------------------------------------------------------------------------------------------------------------------|----------------------------------------------------------------------------------------------------------------------------------------------------------------------------------------------------------------|-------------------------------|
| Herzog CM, et al. 2015 [33]    | United States            | Use of EHR to determine the prevalence of Metabolic Syndrome; look for trends in prevalence over time compare prevalence between.                                      | In this study, only the use of EHR in the prevalence of metabolic syndrome for active duty is reported.                                                            | Web-based                   | Hospitals and clinics | Documenting of medical-related data, exchange of information                                               | ICD 10                 | SDKs                                                    | Department of Defense                         | Semantic                | Military Health System<br>1. demographics<br>2. diagnoses<br>4. paraclinic and vital values<br>5. procedures and treatments                                                                    | The use of EHRs can explore policies to help reduce outbreaks.                                                                                                                                                 | 10 (low risk)                 |
| Leightley D, et al. 2018 [34]  | England, Scotland, Wales | Development of integrated EHR to capture summaries of care and contact made to healthcare services as well as produce a multi-nation dataset of secondary health care. | With outpatient care being sparsely coded making it challenging for use in epidemiological research and matching process due to complex structures is challenging. | Web-based                   | Hospitals             | Documenting of medical-related data, exchange of information                                               | ICD 10, OPCS, HL7 FHIR | SDKs                                                    | England, Scotland and Wales Armed Forces      | Semantic                | National Health Service<br>1. demographics<br>2. drug prescriptions<br>3. diagnoses<br>4. treatment<br>5. paraclinic and vital values<br>6. clinical notes<br>7. patient self-reported illness | EHR was designed to monitor the cost of treatment, enable administrative oversight, and epidemiological research.                                                                                              | 9 (low risk)                  |
| Bramoweth AD, et al. 2018 [35] | United States            | Examination of insomnia and insomnia-related care with EHR data.                                                                                                       | Despite efforts to standardize aspects of data entry in the EHR, variation and inaccuracy persisted.                                                               | Web-based                   | Hospitals and clinics | Documenting of medical-related data, exchange of information                                               | ICD 9, ICD 10          | Data warehouse,                                         | Department of Defense                         | Semantic                | Office of Mental Health Services<br>1. sociodemographic<br>2. diagnoses<br>3. medications<br>4. assessment and treatment                                                                       | EHR can help to improve care and improve veteran health and quality of life.                                                                                                                                   | 12 (low risk)                 |
| Leightley D, et al. 2023 [36]  | England                  | Development a tool for indicating veteran status across all healthcare services.                                                                                       | This system does not rely on any coding structure or predefined fields and solely uses free-text documents.                                                        | Web-based                   | Hospitals and clinics | Documenting of medical-related data, exchange of information, determining the healthcare needs of veterans | N/A                    | Rule-based approach, SQL, machine learning, NLP, python | England Armed Forces                          | Semantic                | National Health Service<br>free text style<br>1. demographics<br>2. drug prescriptions<br>3. diagnoses<br>4. treatment<br>5. paraclinic                                                        | EHR has the potential to be used to support veterans for clinical documentation purposes                                                                                                                       | 11 (low risk)                 |
| Milenković D, et al. 2012 [37] | Serbia                   | Building a comprehensive and integrated EHR, which will enable the collection and management of all data relevant to a complex healthcare system?                      | Limited resources and infrastructure were the most important challenges                                                                                            | Web-based                   | Hospitals and clinics | Documenting of medical-related data, exchange of information, management                                   | HL7, CDA               | ICT equipment                                           | Ministry of Defense of the Republic of Serbia | Semantic                | 1. scheduling of examinations<br>2. diagnosis<br>3. paraclinics<br>4. pharmacy<br>5. procedure                                                                                                 | The main features of the new approach are orientation to a patient, health care based on evidence, exchange of information about the health of a patient in order to improve health services and reduce costs. | 10 (low risk)                 |

(Continued)

Table 2. (Continued)

| Authors and Year             | Country       | Research objective                                                                                                                              | Challenges                                                                                                                         | Architecture and components | Setting               | Included processes                                                                 | Used standards | Platform and technology                                                                          | Extent of implementation                                       | Interoperability aspect | Information resource                                                                                                                 | Key findings                                                                                                                                                                               | QUADAS score and risk of bias |
|------------------------------|---------------|-------------------------------------------------------------------------------------------------------------------------------------------------|------------------------------------------------------------------------------------------------------------------------------------|-----------------------------|-----------------------|------------------------------------------------------------------------------------|----------------|--------------------------------------------------------------------------------------------------|----------------------------------------------------------------|-------------------------|--------------------------------------------------------------------------------------------------------------------------------------|--------------------------------------------------------------------------------------------------------------------------------------------------------------------------------------------|-------------------------------|
| Charles MJ, et al. 2005 [38] | United States | Use of EHR to automate patient data documentation, leading to improvements in patient safety.                                                   | The main challenge of EHR is ensuring the security and privacy of sensitive patient information.                                   | Web-based                   | Hospitals and clinics | Documenting of medical-related data, exchange of information, management, CPOE     | HL7, CDA       | Information systems, CDR                                                                         | Department of Defense                                          | Semantic                | Military Health System<br>1. demographics<br>2. drug prescriptions<br>3. diagnoses<br>4. treatment<br>5. paraclinic and vital values | Secure online access to longitudinal health records is possible using EHR that greatly improving overall health care delivery and supporting patient safety initiatives for beneficiaries. | 9 (low risk)                  |
| Lucas JE, et al. 2017 [39]   | United States | Use of EHR data to build a model for treatment of cardiovascular disease.                                                                       | EHR are an increasingly common source of data that are challenging to analyze.                                                     | Web-based                   | Hospitals and clinics | Documenting of medical-related data, exchange of information, management, research | ICD 10         | SDKs                                                                                             | Department of Defense                                          | Semantic                | Military Health System<br>1. demographics<br>2. drug prescriptions<br>3. diagnoses<br>4. treatment<br>5. paraclinic                  | Electronic health records data can be used to build a predictive model of treatment adherence that also correlates with cardiovascular benefits.                                           | 8 (low risk)                  |
| Li R, et al. 2023 [40]       | United States | Use of EHR data with machine learning approaches to determination of signs and symptoms of Alzheimer's disease and prediction it onset earlier. | This study focused on screening for Alzheimer's disease in the general population, and did not specifically address other disease. | Web-based                   | Hospitals and clinics | Documenting of medical-related data, exchange of information, research             | ICD 10 CM      | Machine learning including logistic regression, support vector machine, AdaBoost, random forests | Department of Veterans Affairs, Veterans Health Administration | Semantic                | 1. demographics<br>2. drug prescriptions<br>3. diagnoses<br>4. treatment<br>5. paraclinic                                            | This approach may be useful to help identify people at future risk for Alzheimer's disease.                                                                                                | 11 (low risk)                 |

<https://doi.org/10.1371/journal.pone.0313641.t002>

especially beneficial in large healthcare systems where efficiency and cost-effectiveness are crucial.

5. **Technological Advancements:** With advancements in technology, EHR systems have become more sophisticated, incorporating features such as machine learning, natural language processing, and predictive analytics. These capabilities open up avenues for innovation and further research.

Overall, the growth of electronic health records has attracted global interest due to their potential to transform healthcare delivery, enhance research capabilities, and improve patient outcomes [41–43].

To achieve these goals, EHRs must combine different processes, including clinical documentation, appointment setting, e-prescribing, querying, data mapping, disease surveillance, telemedicine, decision support, CPOE, information management and so on for different functions [44].

Military healthcare systems have unique characteristics and needs that require specialized EHR solutions. The environment of military contracts may be less inclined towards the use of EHR and digitalization in general due to several factors:

1. **Legacy Systems:** The military often operates using legacy systems that have been in place for many years. These systems may be outdated or lack interoperability with modern digital solutions. Upgrading or replacing these systems to accommodate electronic records and digitalization can be complex, time-consuming, and expensive.
2. **Security Concerns:** The military places a strong emphasis on security due to the sensitive and confidential nature of military operations. There may be concerns about the security of electronic records and potential vulnerabilities of digital systems. Ensuring the integrity, confidentiality, and availability of sensitive military healthcare data is of utmost importance, and transitioning to electronic records requires robust security measures and technologies.
3. **Unique Operational Environments:** Military operations often take place in remote or harsh environments where infrastructure, including reliable network connectivity and power supply, may be limited. These challenging operational environments may pose obstacles to the successful implementation and maintenance of electronic records systems, making paper documentation more practical and reliable in some situations.
4. **Interoperability Challenges:** Achieving interoperability between different military systems and electronic health record systems can be complex. The military has highly specialized systems and operational requirements, and integrating the diverse range of systems used by various military branches and agencies may present challenges in terms of data standardization and interoperability.
5. **Procurement Process:** The procurement processes in military contracts can be lengthy and bureaucratic, involving strict regulations and requirements. These processes may not be well-suited for the rapid adoption and implementation of new technologies like electronic health records and digitalization.

The military needs to ensure that any technology adopted meets its stringent quality standards and is cost-effective in the long run. Military EHRs, while still subject to general healthcare regulations, must also adhere to additional regulations specific to the armed forces. However, it's worth noting that the military has recognized the potential benefits of electronic health records and digitalization in improving healthcare delivery for military personnel, streamlining processes, and enhancing interoperability among various military systems.

Efforts are underway to gradually adopt and integrate electronic records systems within the military healthcare system, while addressing the unique challenges and requirements of the military environment [45–47].

The majority of studies on the use of electronic records and digitalization in military contracts being conducted at the Department of Defense (DoD) level can be attributed to a few factors. The DoD has significant resources, both in terms of funding and personnel, to conduct research and studies. This allows them to invest in exploring the potential benefits and challenges of implementing electronic records and digitalization in military contracts. The DoD is one of the largest organizations in the world, with a vast network of military personnel, healthcare facilities, and support systems. Studying the implementation of electronic records and digitalization within such a large and complex organization can provide valuable insights and help establish best practices that can be applied to other military contexts. As mentioned earlier, the military healthcare system deals with sensitive and confidential information. The DoD is heavily invested in ensuring the security and privacy of this information, making it particularly concerned with studying the impacts and risks associated with electronic records and digitalization [48].

As for the majority of these studies being conducted in the United States, there are a few reasons. The United States, as one of the world's leading military powers, allocates significant resources to defense-related research. This includes research on topics like electronic records and digitalization within military contracts. The United States has a well-established and extensive military infrastructure, which includes research institutions, military hospitals, and healthcare systems. This infrastructure provides a conducive environment for conducting studies and research on military-specific topics. The United States has a strong network of collaborations and partnerships between academia, industry, and the government. This allows for multidisciplinary research efforts and knowledge exchange, leading to many studies being conducted in the United States.

While the majority of studies have been conducted in the United States, there are also research efforts and studies taking place in other countries that are exploring electronic records and digitalization in the military context. The findings from these studies contribute to the collective understanding of the benefits, challenges, and best practices associated with implementing electronic records and digitalization in military contracts on a global scale [49].

HL7 FHIR, CDA, HIPAA, ICD-10, ICD-9, ISO TC, SDKs and web-based architecture are all important components in the world of EHR.

HL7 FHIR is important for interoperability, modular approach, RESTful APIs, and data standardization. These features enable seamless data exchange, targeted data retrieval, real-time access, streamlined workflow integration, and consistent data representation across different healthcare systems and platforms [50].

CDA is an HL7 standard that defines the structure and semantics for clinical documents. It is widely used in EHR systems for capturing, storing, and exchanging clinical information. CDA enables the structured representation of patient data, improving data accuracy, comprehensibility, and clinical decision-making. It supports clinical document types like discharge summaries, progress notes, and lab reports [51].

In recent years, HL7 FHIR has been increasingly utilized for representing clinical data through the use of "resources", which can then be exchanged via standardized REST APIs. Therefore, FHIR resources are frequently chosen over the HL7 CDA standard due to their lightweight, flexible design, and focus on interoperability in modern healthcare systems. One of the primary reasons for favoring FHIR over HL7 CDA is its ease of implementation and integration with existing systems. FHIR resources leverage modern web technologies such as RESTful APIs, JSON, and XML, which simplifies the work for developers. In contrast, HL7

CDA relies on a complex XML format that may pose challenges in parsing and integration with other systems. Additionally, FHIR resources are modular and granular, enabling more targeted data exchange compared to the monolithic nature of HL7 CDA documents. This granularity facilitates precise data retrieval and exchange between systems, reducing the risk of information overload and enhancing efficiency. Furthermore, FHIR resources are designed to be scalable and adaptable to meet evolving healthcare needs. By allowing for the easy addition of new resources and extensions, FHIR can cater to changing requirements in healthcare systems without requiring significant rework or redesign. In conclusion, FHIR resources are often preferred over the HL7 CDA standard due to their modern design, ease of implementation, scalability, and flexibility in interoperability with other systems [50,51].

HIPAA is a legislation that ensures the privacy and security of patients' health information. It sets standards for electronic transactions, privacy rules, security measures, and breach notification requirements. Compliance with HIPAA safeguards patient confidentiality, prevents unauthorized access or disclosure of health data, and establishes trust in the healthcare system [52].

ICD-10 and ICD-9 are classification systems used for coding and categorizing diseases, conditions, and procedures in healthcare. ICD-10 is the more recent version and provides more detailed and specific codes compared to ICD-9. These coding systems allow EHR systems to accurately capture and communicate clinical information, support billing processes, facilitate research and analysis, and contribute to interoperability [53].

ISO TC is a technical committee of the International Organization for Standardization that develops international standards for various industries, including healthcare. Standards developed by ISO TC ensure interoperability, quality, and safety in healthcare systems, devices, and informatics. Adherence to ISO standards in EHR systems promotes global compatibility, enhances data exchange, and facilitates collaboration [54].

SDKs provide developers with a set of tools, libraries, and documentation to build applications for a specific platform or framework. In the context of EHR, SDKs can simplify the development process, accelerate application creation, and provide access to APIs and resources for integrating with EHR systems. SDKs enhance developer productivity and promote innovation in the healthcare software ecosystem [55].

Web-based architecture refers to the use of web technologies for designing and delivering EHR systems. This architecture enables access to EHR applications through web browsers, making them platform-independent and easily accessible from different devices. Web-based EHR systems can promote remote access, telemedicine, and patient engagement. They also facilitate updates and maintenance as changes can be deployed centrally without requiring client-side installations [56].

A system-level approach to understanding web-based systems involves looking at the various components and interactions within the system as a whole. In the context of a web-based system, this includes the software application, hardware infrastructure, network connectivity, data storage, security measures, and user interfaces [57]. Some benefits of using a web-based system from a system-level approach include:

- **Centralized data:** Web-based systems typically centralize data storage, making it easier to manage and access information from anywhere. This facilitates better integration between different modules or components within the system.
- **Scalability:** Web-based systems can easily scale up or down based on the requirements of the organization. This scalability allows for the system to handle increased traffic, users, or data without major disruptions.



- **Interoperability:** Web-based systems can provide seamless integration with other systems or applications through APIs (Application Programming Interfaces). This enables data sharing and communication between different systems, improving efficiency and productivity.
- **Redundancy and backup:** Web-based systems often have built-in redundancy and backup mechanisms to ensure data integrity and continuity of operations. This minimizes the risk of data loss or system downtime in case of failures.
- **Performance monitoring:** Web-based systems can offer performance monitoring and analytics tools to track system usage, response times, and overall system health. This data can be used to optimize system performance and identify potential bottlenecks.
- **Flexibility and customization:** Web-based systems can be easily customized and tailored to meet the specific requirements of an organization. This flexibility allows for the system to adapt to changing business needs and user preferences [58–60].

By taking a system-level approach to understanding web-based systems, organizations can gain a comprehensive understanding of the various components and interactions within the system. This can help in optimizing system performance, enhancing user experience, and achieving business objectives effectively [61].

Overall, these components play crucial roles in facilitating interoperability, data exchange, privacy, coding and classification, standardization, development, and access in EHR systems.

The implementation of EHR indeed comes with its fair share of challenges. To overcome these challenges, several actions can be taken, including adequate planning and requirements assessment, leadership buy-in and support, effective change management, user training and support, standards adoption, use of data privacy and security measures, continuous evaluation and optimization. By addressing these challenges proactively and implementing appropriate strategies, organizations can overcome barriers and leverage the full potential of EHR systems, improving patient care, clinical outcomes, and operational efficiencies [62].

Another important point, in addition to the circuit mentioned above, is recognizing the involvement of civilian healthcare providers in delivering medical services to military personnel. Although military healthcare organizations typically handle primary care, more specialized or advanced treatments are often provided by civilian healthcare facilities. This can complicate the management of military electronic health records (EHRs) since information may need to be shared or integrated between military and civilian healthcare systems. It underscores the importance of seamless coordination and communication between military and civilian healthcare providers to ensure comprehensive and effective healthcare for military personnel. While advanced care is often referred to civilian healthcare providers. This significant dynamic affects the effectiveness and comprehensiveness of military EHRs, as it necessitates a seamless integration of both military and civilian health records to ensure continuity of care for military personnel [63].

## Conclusion

The immediate access to comprehensive patient information, regardless of location, is vital during military deployments and emergency situations to ensure efficient diagnosis, treatment, and monitoring of military personnel. Thus, there is an urgent need to integrate EHR into military healthcare systems [64]. This systematic review contributes to the existing knowledge by providing an overview of EHR usage in military healthcare systems, emphasizing the necessary requirements, available standards, and challenges. It could serve as a strategic starting point for EHR implementation in military healthcare systems, particularly in countries

where e-health planning and development are still in early stages. The findings set the stage for future research and provide insight to policymakers and practitioners regarding the potential benefits and obstacles associated with EHR adoption in military healthcare settings. However, the implementation of EHR, especially when dealing with sensitive information, is a time-consuming process that requires a large, multidisciplinary expert team.

## Limitations

The broad subject of EHR includes various aspects and recent studies in this field have a large scope. Therefore, this study focuses mainly on informatics and management issues of EHR implementation in military healthcare systems. However, technical, legal, and organizational issues, which are important bottlenecks, were not covered. It is recommended that future studies address each of these areas separately. Additionally, the study was limited by lack of access to some articles due to unavailable full text and non-English language.

## Supporting information

**S1 File. PRISMA 2020 checklist.**  
(DOCX)

**S2 File. Numbered table of all 6051 studies.**  
(XLS)

## Acknowledgments

We gratefully acknowledge all those who helped in this study.

## Author Contributions

**Conceptualization:** Amir Torab-Miandoab, Leila Gholamhosseini.

**Data curation:** Amir Torab-Miandoab, Mahdi Basiri, Arasb Dabbagh-Moghaddam, Leila Gholamhosseini.

**Formal analysis:** Amir Torab-Miandoab, Mahdi Basiri, Arasb Dabbagh-Moghaddam, Leila Gholamhosseini.

**Investigation:** Amir Torab-Miandoab, Mahdi Basiri.

**Methodology:** Amir Torab-Miandoab, Leila Gholamhosseini.

**Project administration:** Leila Gholamhosseini.

**Resources:** Amir Torab-Miandoab.

**Supervision:** Leila Gholamhosseini.

**Validation:** Amir Torab-Miandoab, Mahdi Basiri, Arasb Dabbagh-Moghaddam, Leila Gholamhosseini.

**Visualization:** Amir Torab-Miandoab, Leila Gholamhosseini.

**Writing – original draft:** Amir Torab-Miandoab, Arasb Dabbagh-Moghaddam, Leila Gholamhosseini.

**Writing – review & editing:** Amir Torab-Miandoab, Mahdi Basiri, Arasb Dabbagh-Moghaddam, Leila Gholamhosseini.

## References

1. Atasoy H, Greenwood BN, McCullough JS. The digitization of patient care: a review of the effects of electronic health records on health care quality and utilization. *Annual review of public health*. 2019 Apr 1; 40:487–500. <https://doi.org/10.1146/annurev-publhealth-040218-044206> PMID: 30566385
2. Sriram RD, Subrahmanian E. Transforming health care through digital revolutions. *Journal of the Indian Institute of Science*. 2020 Oct; 100:753–72. <https://doi.org/10.1007/s41745-020-00195-0> PMID: 33132546
3. Elharish S F., Denna I M. Maatuk A, K. Elberkawi E. Application of Electronic Health Records in Poly-clinics: Barriers & Benefits. In *International Conference on Data Science, E-learning and Information Systems 2021* 2021 Apr 5 (pp. 40–46).
4. Friedl KE, Talbot TB, Steffensen S. Information Science and Technology: A New Paradigm in Military Medical Research. In *R&D Management in the Knowledge Era: Challenges of Emerging Technologies 2019* Jun 25 (pp. 3–44). Cham: Springer International Publishing.
5. Tanielian T, Farmer C. The US Military Health System: promoting readiness and providing health care. *Health Affairs*. 2019 Aug 1; 38(8):1259–67. <https://doi.org/10.1377/hlthaff.2019.00239> PMID: 31381396
6. Cox AT, Linton T, Lentaing J, Sharma S, Wilson D. A review of the documentation in the British Armed Forces electronic patient record following discharge from the Role 3 Hospital in Camp Bastion. *BMJ Military Health*. 2014 Oct 3. <https://doi.org/10.1136/jramc-2014-000337> PMID: 25280475
7. Westmoreland WC. Exploring the Perspectives from Records Management Personnel: The Challenges of Electronic Health Records Management. Colorado Technical University; 2019.
8. Murray JS. The United States Military and Veterans Administration Health Systems: Contemporary Overview and Policy Challenges. *Policy & Politics in Nursing and Health Care-E-Book*. 2015 Apr 24: 326.
9. Huang C, Koppel R, McGreevey JD III, Craven CK, Schreiber R. Transitions from one electronic health record to another: challenges, pitfalls, and recommendations. *Applied clinical informatics*. 2020 Oct; 11(05):742–54. <https://doi.org/10.1055/s-0040-1718535> PMID: 33176389
10. Page MJ, McKenzie JE, Bossuyt PM, Boutron I, Hoffmann TC, Mulrow CD, et al. Updating guidance for reporting systematic reviews: development of the PRISMA 2020 statement. *Journal of clinical epidemiology*. 2021 Jun 1; 134:103–12. <https://doi.org/10.1016/j.jclinepi.2021.02.003> PMID: 33577987
11. Whiting PF, Rutjes AW, Westwood ME, Mallett S, Deeks JJ, Reitsma JB, et al. QUADAS-2: a revised tool for the quality assessment of diagnostic accuracy studies. *Annals of internal medicine*. 2011 Oct 18; 155(8):529–36. <https://doi.org/10.7326/0003-4819-155-8-201110180-00009> PMID: 22007046
12. Bar-Dayana Y, Saed H, Boaz M, Misch Y, Shahar T, Husiascky I, et al. Using electronic health records to save money. *Journal of the American Medical Informatics Association*. 2013 Jun 1; 20(e1):e17–20. <https://doi.org/10.1136/amiajnl-2012-001504> PMID: 23462876
13. Do NV, Barnhill R, Heermann-Do KA, Salzman KL, Gimbel RW. The military health system's personal health record pilot with Microsoft HealthVault and Google Health. *Journal of the American Medical Informatics Association*. 2011 Mar 1; 18(2):118–24. <https://doi.org/10.1136/jamia.2010.004671> PMID: 21292705
14. Spott MA, Kurkowski CR, Burelison DR, Stockinger Z. The DoD Trauma Registry versus the electronic health record. *Military medicine*. 2018 Sep 1; 183(suppl\_2):8–11. <https://doi.org/10.1093/milmed/usy150> PMID: 30189085
15. Khan S. Military health system transformation implications on health information technology modernization. *Military Medicine*. 2018 Mar 1; 183(3–4):56–9. <https://doi.org/10.1093/milmed/usx100> PMID: 29420787
16. Hoyt R, Yoshihashi A. Lessons learned from implementation of voice recognition for documentation in the military electronic health record system. *Perspectives in health information management/AHIMA, American Health Information Management Association*. 2010; 7(Winter). PMID: 20697464
17. Chretien JP, Chretien KC, Pavlin JA. Long-term health consequences of military service: A proposal to strengthen surveillance and research. *Public health reports*. 2016 Nov; 131(6):834–8. <https://doi.org/10.1177/0033354916669342> PMID: 28123231
18. Giannakopoulou O, Toumpaniaris P, Kouris IN, Moirogiorgou K, Karanasiou N, Aisopou V, et al. A Platform for Health Record Management of the Conscripts in the Hellenic Navy. In *MIE 2021* May 1 (pp. 362–366). <https://doi.org/10.3233/SHTI210181> PMID: 34042766
19. Jingquan L. A Service-Oriented Approach to Interoperable and Secure Personal Health Record Systems. *IEEE SOSE*, 2017; 10:1109.
20. Singla M, Hutfless S, Al Kazzi E, Rodriguez B, Betteridge J, Brant SR. Clinical codes combined with procedure codes increase diagnostic accuracy of Crohn's disease in a US Military health record. *BMJ open*

- gastroenterology. 2020 Feb 1; 7(1):e000378. <https://doi.org/10.1136/bmjgast-2020-000378> PMID: 32518662
21. Sloane E, Leroy G, Sheetz S. An Integrated Social Actor and Service Oriented Architecture (SOA) Approach for Improved Electronic Health Record (EHR) Privacy and Confidentiality in the US National Healthcare Information Network (NHIN). AMCIS 2007 Proceedings. 2007 Dec 31:366.
  22. Friedman DR, Patil V, Li C, Rassmussen KM, Burningham Z, Hamilton-Hill S, et al. Integration of patient-reported outcome measures in the electronic health record: The Veterans Affairs experience. JCO Clinical Cancer Informatics. 2022 Mar; 6:e2100086. <https://doi.org/10.1200/CCI.21.00086> PMID: 35290072
  23. Smith B, Chu LK, Smith TC, Amoroso PJ, Boyko EJ, Hooper TI, et al. Challenges of self-reported medical conditions and electronic medical records among members of a large military cohort. BMC Medical Research Methodology. 2008 Dec; 8:1–0.
  24. Li L, Zhao D, Meng H, Wang H, Wu F. The Design and Application of an Electronic Health Record System for Digital Health Management. In: HEALTHINF 2014 Mar 3 (pp. 413–416).
  25. Wong KH, Bayarsaikhan S, Levine BA, Mun SK. Prototype of a military medic smartphone medical graphical user interface for use by medics in deployed environments. Military Medicine. 2020 Jan 7; 185 (Supplement\_1):536–43. <https://doi.org/10.1093/milmed/usz225> PMID: 32074363
  26. Blossnich JR, Montgomery AE, Dichter ME, Gordon AJ, Kavalieratos D, Taylor L, et al. Social determinants and military veterans' suicide ideation and attempt: a cross-sectional analysis of electronic health record data. Journal of general internal medicine. 2020 Jun; 35:1759–67. <https://doi.org/10.1007/s11606-019-05447-z> PMID: 31745856
  27. Thériault FL, Momoli F, Hawes RA, Garber BG, Gardner W, Colman I. Spinal pain and major depression in a military cohort: bias analysis of dependent misclassification in electronic medical records. Social Psychiatry and Psychiatric Epidemiology. 2022 Mar; 57(3):575–81. <https://doi.org/10.1007/s00127-021-02160-3> PMID: 34374826
  28. Rockswold PD, Finnell VW. Predictors of tool usage in the military health system's electronic health record, the Armed Forces Health Longitudinal Technology Application. Military medicine. 2010 May 1; 175(5):313–6. <https://doi.org/10.7205/milmed-d-09-00286> PMID: 20486501
  29. Silva R, Medina JA, Daher JE, Alvarado RM, Recalde T. Interoperable Electronic Health Records (EHRs) for Ecuador. J Health Med Informat. 2017; 8(271):2.
  30. Wilk JE, Herrell RK, Carr AL, West JC, Wise J, Hoge CW. Diagnosis of PTSD by Army behavioral health clinicians: are diagnoses recorded in electronic health records?. Psychiatric Services. 2016 Aug 1; 67(8):878–82. <https://doi.org/10.1176/appi.ps.201500292> PMID: 26975516
  31. Reimer RJ, Goncalves A, Soper B, Cadena J, Wilson JL, Gryshuk AL, et al. An electronic health record cohort of Veterans with amyotrophic lateral sclerosis. Amyotrophic Lateral Sclerosis and Frontotemporal Degeneration. 2023 Oct 2; 24(7–8):695–701. <https://doi.org/10.1080/21678421.2023.2239300> PMID: 37555559
  32. Ladan A, Daura UD. Health Information Management by Record Officers: A Study of Military Hospitals in Lagos Metropolis. MiddleBelt Journal of Library and Information Science. 2015 Aug 29; 13.
  33. Herzog CM, Chao SY, Eilerman PA, Luce BK, Carnahan DH. Metabolic syndrome in the Military Health System based on electronic health data, 2009–2012. Military Medicine. 2015 Jan 1; 180(1):83–90. <https://doi.org/10.7205/MILMED-D-14-00039> PMID: 25562862
  34. Leightley D, Chui Z, Jones M, Landau S, McCrone P, Hayes RD, et al. Integrating electronic healthcare records of armed forces personnel: Developing a framework for evaluating health outcomes in England, Scotland and Wales. International journal of medical informatics. 2018 May 1; 113:17–25. <https://doi.org/10.1016/j.ijmedinf.2018.02.012> PMID: 29602429
  35. Bramoweth AD, Tighe CA, Berlin GS. Insomnia and insomnia-related care in the Department of Veterans Affairs: an electronic health record analysis. International journal of environmental research and public health. 2021 Aug 13; 18(16):8573. <https://doi.org/10.3390/ijerph18168573> PMID: 34444321
  36. Leightley D, Palmer L, Williamson C, Leal R, Chandran D, Murphy D, et al. Identifying Military Service Status in Electronic Healthcare Records from Psychiatric Secondary Healthcare Services: A Validation Exercise Using the Military Service Identification Tool. In: Healthcare 2023 Feb 10 (Vol. 11, No. 4, p. 524). MDPI. <https://doi.org/10.3390/healthcare11040524> PMID: 36833058
  37. Milenković D, Jovanović MM, Vujin V, Aleksić A, Radojičić Z. Electronic health system: Development and implementation into the health system of the Republic of Serbia. Vojnosanitetski pregled. 2012; 69(10):880–90. PMID: 23155610
  38. Charles MJ, Harmon BJ, Jordan PS. Improving patient safety with the military electronic health record. Advances in Patient Safety: From Research to Implementation (Volume 3: Implementation Issues). 2005 Feb.

39. Lucas JE, Bazemore TC, Alo C, Monahan PB, Voora D. An electronic health record based model predicts statin adherence, LDL cholesterol, and cardiovascular disease in the United States Military Health System. *Plos one*. 2017 Nov 20; 12(11):e0187809. <https://doi.org/10.1371/journal.pone.0187809> PMID: 29155848
40. Li R, Wang X, Berlowitz D, Silver B, Hu W, Keating H, et al. Early Prediction of Alzheimers Disease Leveraging Symptom Occurrences from Longitudinal Electronic Health Records of US Military Veterans. *arXiv preprint arXiv:2307.12369*. 2023 Jul 23.
41. Tsai CH, Eghdam A, Davoody N, Wright G, Flowerday S, Koch S. Effects of electronic health record implementation and barriers to adoption and use: a scoping review and qualitative analysis of the content. *Life*. 2020 Dec 4; 10(12):327. <https://doi.org/10.3390/life10120327> PMID: 33291615
42. Vuokko R, Mäkelä-Bengs P, Hyppönen H, Lindqvist M, Doupi P, Zandieh S, et al. Impact of electronic versus paper-based recording before EHR implementation on health care professionals' perceptions of EHR use, data quality, and data reuse. *Applied clinical informatics*. 2019 Mar 20; 10(02):199–209.
43. Lin YK, Lin M, Chen H. Do electronic health records affect quality of care? Evidence from the HITECH Act. *Information Systems Research*. 2019 Mar; 30(1):306–18.
44. Odekunle Florence F. Current roles and applications of electronic health record in the healthcare system. *Health Sciences*. 2016; 5(12):48–51.
45. Martin MB, Petros M, Welter C. Exploratory case study of barriers and facilitators associated with the pilot implementation of a new electronic healthcare record in the military. *Military Medicine*. 2022 Mar 1; 187(3–4):e486–92. <https://doi.org/10.1093/milmed/usab053> PMID: 33580676
46. Born J, Frank C. The relative impact of barriers to care among military health services personnel: exploring differences using context specific scenarios. *BMC Health Services Research*. 2022 May 6; 22(1):607. <https://doi.org/10.1186/s12913-022-07850-5> PMID: 35524306
47. Billing DC, Fordy GR, Friedl KE, Hasselstrøm H. The implications of emerging technology on military human performance research priorities. *Journal of Science and Medicine in Sport*. 2021 Oct 1; 24(10):947–53. <https://doi.org/10.1016/j.jsams.2020.10.007> PMID: 33172765
48. Germain A, Wolfson M, Klenczar B, Brock MS, Hearn H, O'Reilly B, et al. Survey of resources in behavioral sleep medicine across the Department of Defense, Defense Health Agency. *Military Medicine*. 2023 Oct 20: usad409.
49. Holmgren AJ, Downing NL, Bates DW, Shanafelt TD, Milstein A, Sharp CD, et al. Assessment of electronic health record use between US and non-US health systems. *JAMA internal medicine*. 2021 Feb 1; 181(2):251–9. <https://doi.org/10.1001/jamainternmed.2020.7071> PMID: 33315048
50. Tanaka K, Yamamoto R. Implementation of a secured cross-institutional data collection infrastructure by applying HL7 FHIR on an existing distributed EMR storages. In *The Importance of Health Informatics in Public Health during a Pandemic 2020* (pp. 155–158). IOS Press.
51. Tanaka K, Mukai M, Yamamoto R, Mihara N. Data-Sharing Gateway System Design for Large-Scale Medical Information Collection with Distributed EMR Storage. *Studies in Health Technology and Informatics*. 2022 Jun 1; 290:205–9. <https://doi.org/10.3233/SHTI220062> PMID: 35673001
52. Shahriar H, Haddad HM, Farhadi M. Assessing HIPAA compliance of open source electronic health record applications. In *Research Anthology on Securing Medical Systems and Records 2022* (pp. 995–1011). IGI Global.
53. Xu Y, Lee S, Martin E, D'souza AG, Doktorchik CT, Jiang J, et al. Enhancing ICD-code-based case definition for heart failure using electronic medical record data. *Journal of Cardiac Failure*. 2020 Jul 1; 26(7):610–7. <https://doi.org/10.1016/j.cardfail.2020.04.003> PMID: 32304875
54. Ryu B, Shin SY, Baek RM, Kim JW, Heo E, Kang I, et al. Clinical genomic sequencing reports in electronic health record systems based on international standards: implementation study. *Journal of Medical Internet Research*. 2020 Aug 10; 22(8):e15040. <https://doi.org/10.2196/15040> PMID: 32773368
55. Wu S, Cao S, Xu Z. Research and Implementation of Electronic Medical Record System Based on Blockchain. In *2021 IEEE 3rd International Conference on Frontiers Technology of Information and Computer (ICFTIC) 2021* Nov 12 (pp. 754–760). IEEE.
56. Melnick ER, Holland WC, Ahmed OM, Ma AK, Michael SS, Goldberg HS, et al. An integrated web application for decision support and automation of EHR workflow: a case study of current challenges to standards-based messaging and scalability from the EMBED trial. *JAMIA open*. 2019 Dec; 2(4):434–9. <https://doi.org/10.1093/jamiaopen/ooz053> PMID: 32025639
57. Keenan AB, Jenkins SL, Jagodnik KM, Koplev S, He E, Torre D, et al. The library of integrated network-based cellular signatures NIH program: system-level cataloging of human cells response to perturbations. *Cell systems*. 2018 Jan 24; 6(1):13–24. <https://doi.org/10.1016/j.cels.2017.11.001> PMID: 29199020



58. Chamari L, Petrova E, Pauwels P. A web-based approach to BMS, BIM and IoT integration: a case study. In 14th REHVA HVAC World Congress, CLIMA 2022 2022 May 17.
59. Tran TT, Le DQ, Tran TD. Virtualization at file system level: a new approach to secure data in shared environment. *International Journal of Computer Theory and Engineering*. 2016 Jun 1; 8(3):223.
60. Ryder KL, Alles R, Karsai G, Mahadevan N, Evans JW, Witulski AF, et al. Systems engineering and assurance modeling (SEAM): A web-based solution for integrated mission assurance. *Facta universitatis-series: Electronics and Energetics*. 2021; 34(1):1–20.
61. Panda N, Mohapatra DP. Test scenario prioritization from user requirements for web-based software. *International journal of system assurance engineering and management*. 2021 Jun; 12(3):361–76.
62. Awe AJ, Lala OG, Oduwole OA, Oyedepo TA. Electronic Health Records: Adoption and Challenges. *Adeleke University Journal of Science*. 2022 Aug 4; 1(1):139–42.
63. Bond AM, Schwab SD. Utilization variation in military versus civilian care: evidence from TRICARE. *Health Affairs*. 2019 Aug 1; 38(8):1327–34. <https://doi.org/10.1377/hlthaff.2019.00298> PMID: 31381387
64. West VL, Borland D, Hammond WE. Innovative information visualization of electronic health record data: a systematic review. *Journal of the American Medical Informatics Association*. 2015 Mar 1; 22(2):330–9. <https://doi.org/10.1136/amiajnl-2014-002955> PMID: 25336597
